# Supplementary material for: British Thoracic Society guidelines for the investigation and management of pulmonary nodules: accredited by NICE
Source: HighWire-hosted journal article supplement (doi:10.1136/thoraxjnl-2015-207168), 2015-06-16
Supplement: thoraxjnl-2015-207168supp_appendix4.pdf [file thoraxjnl-2015-207168supp_appendix4.pdf]

## **Online Appendix 4**

### **BTS Guideline for the investigation and management of pulmonary nodules**

#### **Patient Information**

Patient information can be found on the National Lung Cancer Forum for Nurses website:

<http://www.nlcfn.org.uk/>

April 2015
